# Supplementary material
Source: publisher figshare collection journal article supplement (https://acs.figshare.com/ndownloader/files/10250169)
Supplement: Supplementary file 1 [file 10250169]

## Supporting Information

### **The 1,2,3-Triazole Ring as a Disulfide Bond Mimetic in Chimeric AGRP-Melanocortin**

#### **Peptide: Design, Synthesis, and Functional Characterization**

Srinivasa R. Tala,<sup>†</sup> Anamika Singh,<sup>†</sup> Cody J. Lensing,<sup>†</sup> Sathya M. Schnell,<sup>†</sup> Katie T. Freeman,<sup>†</sup>

James R. Rocca,<sup>‡</sup> and Carrie Haskell-Luevano<sup>\*,†</sup>

<sup>†</sup>Department of Medicinal Chemistry, University of Minnesota, Minneapolis, Minnesota 55455, United States; <sup>‡</sup>Advanced Magnetic Resonance Imaging and Spectroscopy, McKnight Brain Institute, University of Florida, Gainesville, Florida 32610, United States.

#### Table of Contents:

S2-4.....Analytical data table

S5-8.....NMR spectra

Table S1: Analytical Data for the Peptides Synthesized in This Study <sup>a</sup>

| Peptide | Sequence                                                                                                                                              | HPLC k' (System 1) | HPLC k' (System 2) | m/z Calcd. | m/z Found | Selected IR values (cm <sup>-1</sup> ) |
|---------|-------------------------------------------------------------------------------------------------------------------------------------------------------|--------------------|--------------------|------------|-----------|----------------------------------------|
| 1       | <p>Tyr-Cys-His-DPhe-Arg-Trp-Asn-Ala-Phe-Cys-Tyr-NH<sub>2</sub></p> 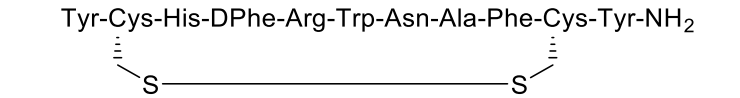 | 4.5                | 8.0                | 1505.6     | 1506.6    | ND                                     |
| 2       |                                                                     | 4.4                | 9.0                | 1508.6     | 1509.0    | 1665.8,<br>2110.8,<br>3284.0           |
| 3       |                                                                    | 5.4                | 9.6                | 1508.6     | 1509.6    | 1676.6,<br>3385.9                      |
| 6       |                                                                   | 5.4                | 8.8                | 1508.6     | 1509.6    | 1678.0,<br>3373.7                      |

|    |                                                                                      |     |      |        |        |                              |
|----|--------------------------------------------------------------------------------------|-----|------|--------|--------|------------------------------|
| 7  | 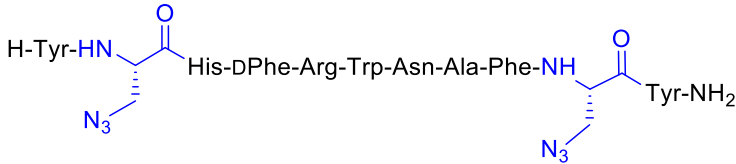   | 5.4 | 10.1 | 1525.6 | 1525.6 | 1673.2,<br>2111.2,<br>3284.8 |
| 8  |    | 7.6 | 13.1 | 1777.8 | 1778.8 | 2341.9,<br>2359.8,<br>3583.3 |
| 12 |    | 7.4 | 11.5 | 1777.8 | 1777.8 | 1676.5,<br>3301.0            |
| 13 |  | 6.2 | 10.1 | 1581.7 | 1581.7 | 1672.3,<br>2103.6,<br>3682.6 |

|    |                                                                                    |     |      |        |        |                   |
|----|------------------------------------------------------------------------------------|-----|------|--------|--------|-------------------|
| 14 | 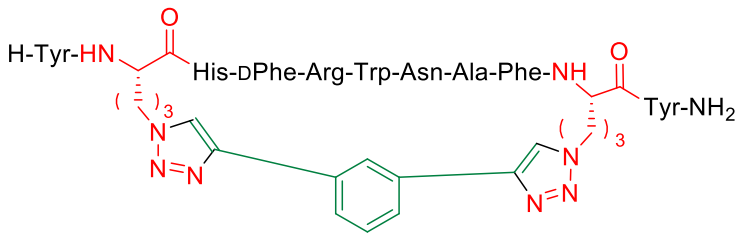 | 7.4 | 12.0 | 1707.8 | 1708.6 | 1699.7,<br>3648.6 |
| 16 |  | 6.9 | 11.0 | 1707.8 | 1708.7 | 1679.9,<br>3405.7 |

<sup>a</sup>The HPLC  $k'$  value equals [(peptide retention time – solvent retention time)/ solvent retention time]. Two different solvent systems were used. Solvent system 1 is 10% acetonitrile (ACN) in 0.1% trifluoroacetic acid/H<sub>2</sub>O with a gradient to 90% acetonitrile over 35 min. Solvent system 2 is 10% methanol (MeOH) in 0.1% trifluoroacetic acid/ H<sub>2</sub>O with a gradient to 90% methanol over 35 min. An analytical Vydac C18 column (Vydac 218TP104) with a flow rate of 1.5 mL/min was used for analytical characterization. The compound purity was determined by RP-HPLC in both solvent systems at a wavelength of 214 nm. All compounds were found to be  $\geq 95\%$  pure. ND: not determined. Mass was determined by ESI-MS on a ABI 3200Q Trap.

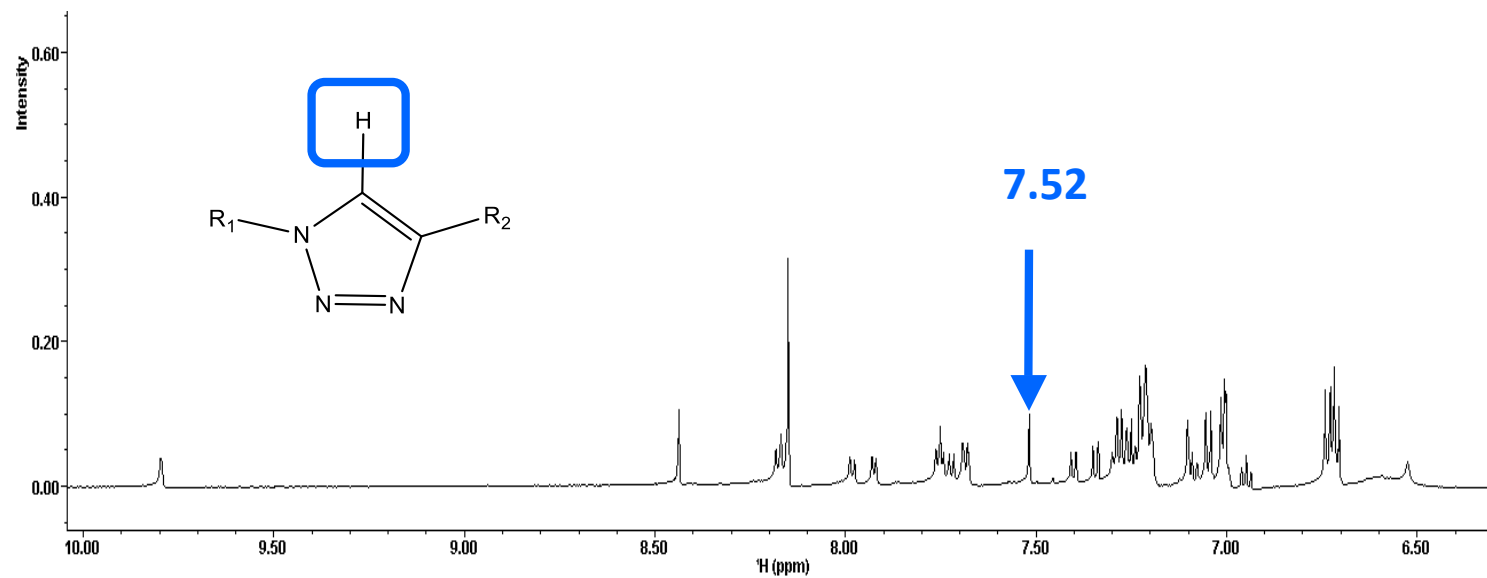

**Supplemental Figure 1:**  $^1\text{H}$ -NMR spectrum of compound 3.

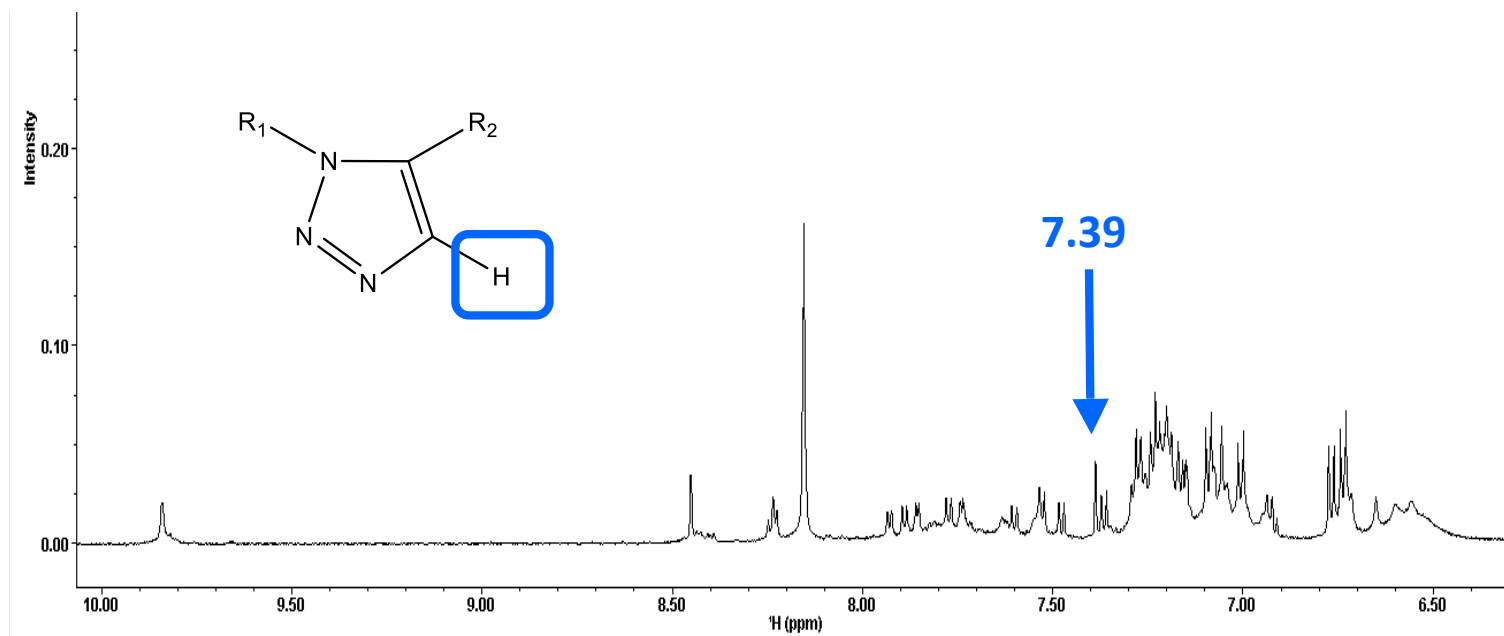

**Supplemental Figure 2:**  $^1\text{H}$ -NMR spectrum of compound 6.

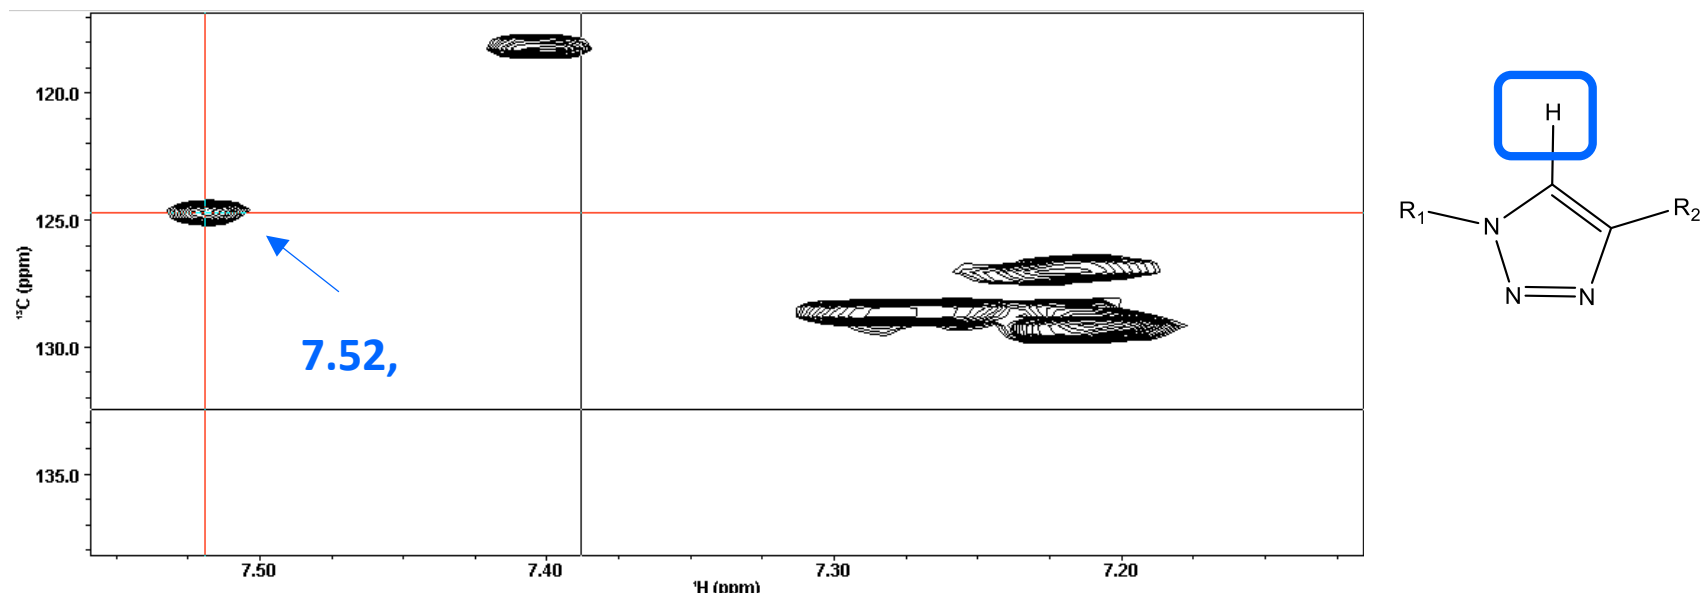

**Supplemental Figure 3:** HSQC ( $^1\text{H}$ - $^{13}\text{C}$ ) spectrum of compound **3** containing the 1,4-Disubstituted triazole.

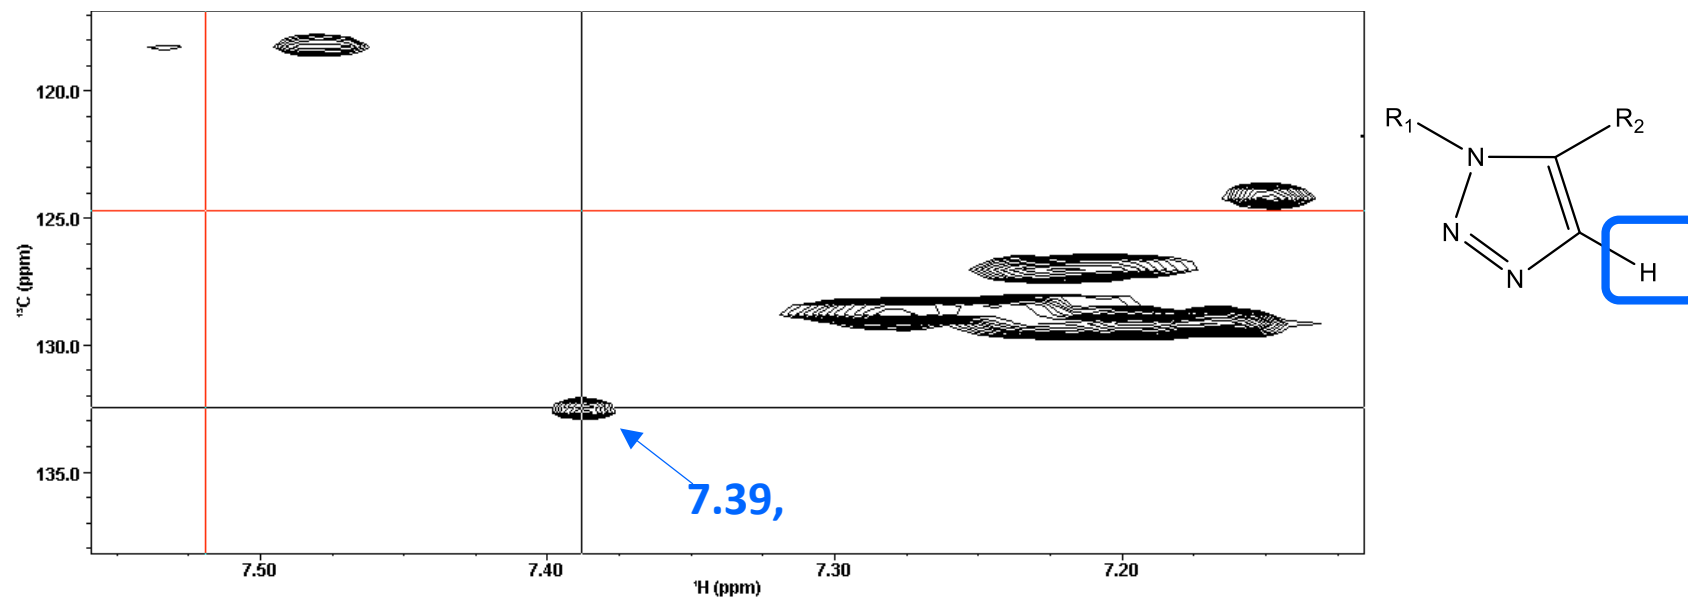

**Supplemental Figure 4:** HSQC ( $^1\text{H}$ - $^{13}\text{C}$ ) spectrum of compound **6** containing the 1,5-disubstituted triazole.
